# Supplementary material for: BMP-Mediated Functional Cooperation between Dlx5;Dlx6 and Msx1;Msx2 during Mammalian Limb Development
Source: PubMed Central journal article supplement (PMC3558506; doi:10.1371/journal.pone.0051700), 2013-01-29

# Suppl. Fig. S1

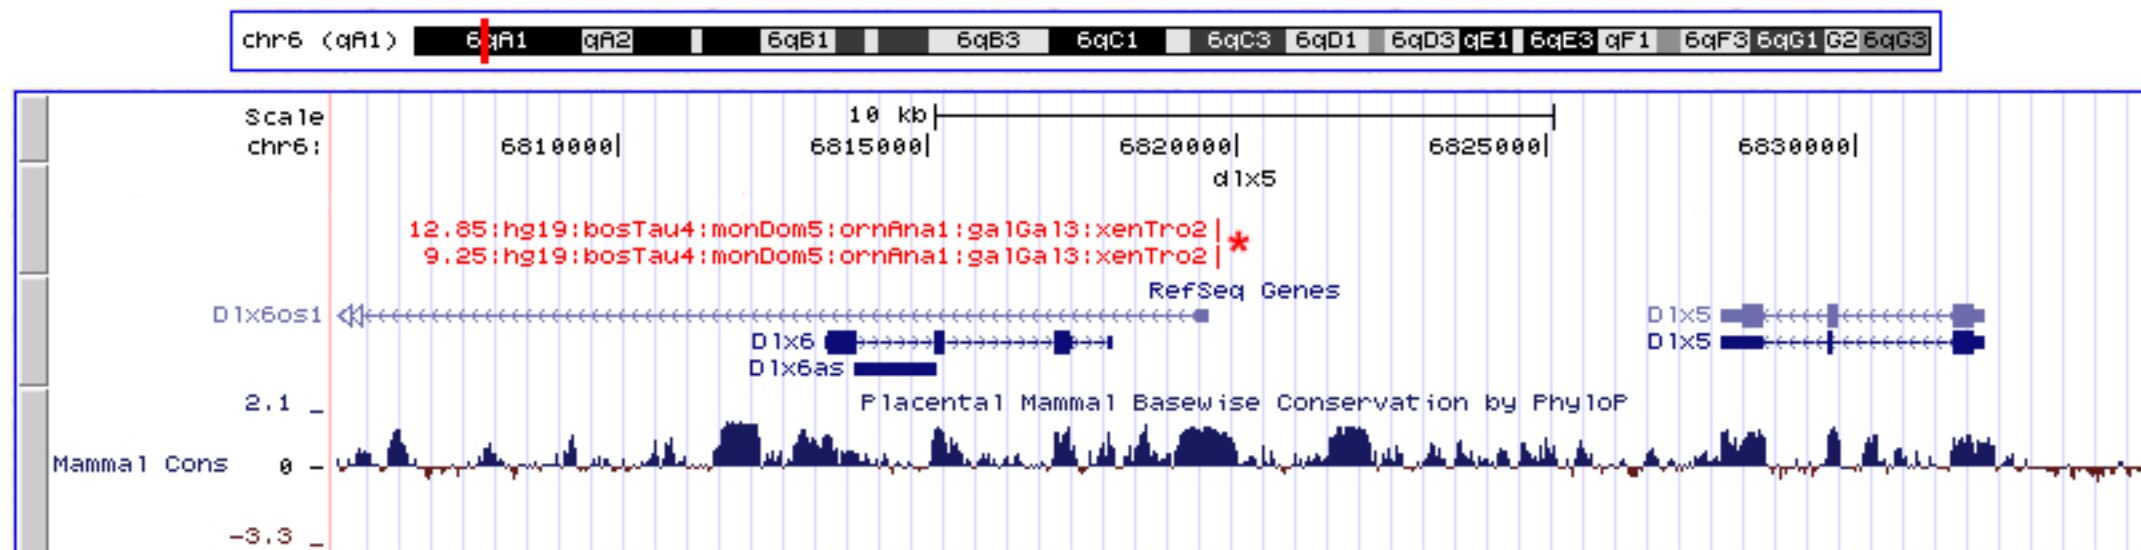

\* Regulatory elements contained in i56i enhancer region

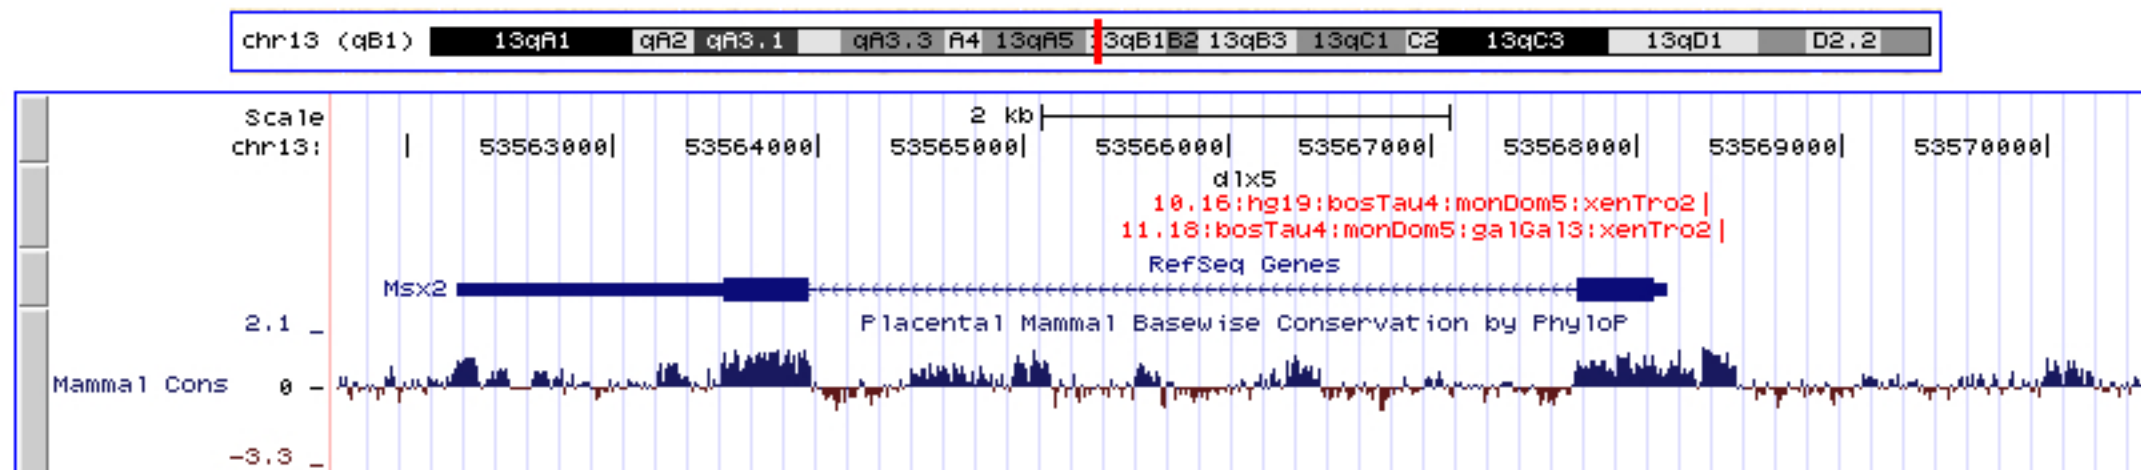

Supplement: pone.0051700.s001.pdf [file pone.0051700.s001.pdf]
