# Supplementary material for: BMP-Mediated Functional Cooperation between Dlx5;Dlx6 and Msx1;Msx2 during Mammalian Limb Development
Source: PubMed Central journal article supplement (PMC3558506; doi:10.1371/journal.pone.0051700), 2013-01-29

*Msx1*<sup>-/-</sup>

Suppl. Fig. S3

*Dlx5*<sup>-/-</sup>;*Dlx6*<sup>-/-</sup>

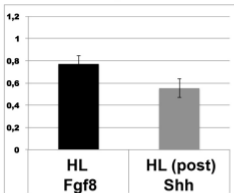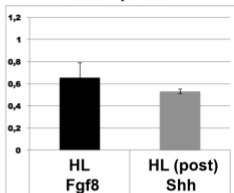

*Msx1*<sup>+/-</sup>;*Dlx5*<sup>+/-</sup>;*Dlx6*<sup>+/-</sup>

*Msx1*<sup>+/-</sup>;*Dlx5*<sup>-/-</sup>;*Dlx6*<sup>-/-</sup>

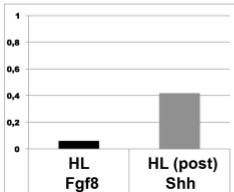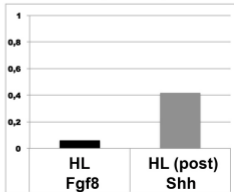

Supplement: pone.0051700.s003.pdf [file pone.0051700.s003.pdf]
