# Supplementary material for: BMP-Mediated Functional Cooperation between Dlx5;Dlx6 and Msx1;Msx2 during Mammalian Limb Development
Source: PubMed Central journal article supplement (PMC3558506; doi:10.1371/journal.pone.0051700), 2013-01-29
Supplement: pone.0051700.s004.pdf [file pone.0051700.s004.pdf]

**Table S1****Sequences of the oligonucleotides used for real-time qPCR on mouse embryonic tissues**

|             |     |                             |
|-------------|-----|-----------------------------|
| <i>Rps9</i> | For | 5' GACCAGGAGCTAAAGTTGATTGGA |
| <i>Rps9</i> | Rev | 5' TCTTGGCCAGGGTAAACTTGA    |
|             |     |                             |
| <i>Dlx5</i> | For | 5' TCTTATGGCAAAGCGCTCAA     |
| <i>Dlx5</i> | Rev | 5' CGTTCACGCCGTGGTACTG      |
|             |     |                             |
| <i>Dlx6</i> | For | 5' TCCAGTGTGGGACGTTTCTG     |
| <i>Dlx6</i> | Rev | 5' CTGTTGGGAGGCATACTGACG    |
|             |     |                             |
| <i>Msx1</i> | For | 5' CTACACCGCCCATGTAGGCTA    |
| <i>Msx1</i> | Rev | 5' CTGGACCCACCTAAGTCAGGT    |
|             |     |                             |
| <i>Msx2</i> | For | 5' ATCCCAGCTTCTAGCCTTGGA    |
| <i>Msx2</i> | Rev | 5' GACAGGTA CTGTTTCTGGCGG   |
|             |     |                             |
| <i>BMP2</i> | For | 5' CAAAATCCCTAAGGCATGCTG    |
| <i>BMP2</i> | Rev | 5' ATGGAGATTGCGCTGAGCTC     |
|             |     |                             |
| <i>BMP4</i> | For | 5' CGAGCCAACACTGTGAGGAGT    |
| <i>BMP4</i> | Rev | 5' AGGTTGAAGAGGAAACGAAAAGC  |
