# Supplementary material for: BMP-Mediated Functional Cooperation between Dlx5;Dlx6 and Msx1;Msx2 during Mammalian Limb Development
Source: PubMed Central journal article supplement (PMC3558506; doi:10.1371/journal.pone.0051700), 2013-01-29
Supplement: pone.0051700.s005.pdf [file pone.0051700.s005.pdf]

**Table S2**

Sequences of the oligonucleotides used for ChIP analysis  
on the predicted *Dlx* elements near the human BMP2 and BMP4 loci

|                                       |
|---------------------------------------|
| <b>B2-RE1</b>                         |
| For: 5' GACTCTCAAGGGAAATCTGAC – 3'    |
| Rev: 5' GGCACAGACTCAAACCTGG – 3'      |
| Amplicon : 172 bp                     |
|                                       |
| <b>B2-RE2</b>                         |
| For: 5' CCGCTTGGCCACAACACTATG – 3'    |
| Rev: 5' GGCCAGACTGTCAGGAAG – 3'       |
| Amplicon: 224 bp                      |
|                                       |
| <b>B2-RE3 (Control Sequence)</b>      |
| For: 5' CATCCTATAAGCTTGGCAGGAG – 3'   |
| Rev: 5' TGCTGGTTAGCAGGACTCGG – 3'     |
| Amplicon: 229 bp                      |
|                                       |
| <b>B4-RE1</b>                         |
| For: 5' GCACACAGCCTGTTTCTCAACG – 3'   |
| Rev: 5' CATGCACCGACTAGTCGCCG – 3'     |
| Amplicon: 248 bp                      |
|                                       |
| <b>B4-RE2</b>                         |
| For: 5' GAGATCATGGCCCAGATAGCAG – 3'   |
| Rev: 5' GGTCAGAAAGATCAAGTTTGTGTC – 3' |
| Amplicon: 196 bp                      |
|                                       |
| <b>Control Exon 3 BMP2</b>            |
| For: 5' GTGACGTGGGGTGGGAATGAC – 3'    |
| Rev: 5' CAGCATCGAGATAGCACTGAG – 3'    |
| Amplicon: 200 bp                      |
|                                       |
| <b>Control Exon 5 BMP4</b>            |
| For: 5' CTGCCGGCGCCACTCGCTC – 3'      |
| Rev: 5' CAGCATGGAGATGGCACTCAG – 3'    |
| Amplicon: 232 bp                      |
