# Supplementary material for: BMP-Mediated Functional Cooperation between Dlx5;Dlx6 and Msx1;Msx2 during Mammalian Limb Development
Source: PubMed Central journal article supplement (PMC3558506; doi:10.1371/journal.pone.0051700), 2013-01-29
Supplement: pone.0051700.s007.pdf [file pone.0051700.s007.pdf]

# Table S4

## Sequences of the mouse and human conserved genomic regions containing predicted Dlx binding sites near the BMP2 locus

### BMP2 locus

Element B2-R1 (30 kb upstream of the Start codon of Bmp2)

Score: 1 Position: chr2:133347131-133347146

Band: 2qF2 Strand: +

```
>mm9_dna range=chr2:133346631-133347646
GTCAAATTAAGGTATCTAATCTGCCACAGGGACCAGCAAAAATGTCAAAA
GACTCCCAAGCACTCCAGCAGCGAGCCATATCTGCCTAGAAGGAAATAGT
TGCCAATACCTTTTAGAAGTAATGTTTTGATGGAAGATATCACAAAAGCC
TAGTTATGGCTACTTTGCCACTTCATACTCCCAAATGACTTAGTTTTCC
GTTCCCTGAGGCTCCCTGCCAGTCACTCAACAAGCCAACAGTACACTTA
ACAAGCTGGCCATCACCATGTTGAAAATATACAACATGCCTTTTCTAAA
CGCTGGGCTGGGAAAAGAAAGATCCCTAGATGCTTTTCCCAACATTTTCC
CTGGCAAATCCAATCTTCACTCGTTTTGTAATTTTAACTCCAAGGGAAA
ACAGACAGCAGCCGTGTCTCAGAAAGAGCGTCTCCCGTAGAGCACCAGAG
ATGTGGTATTTTTAATAGCTGCCTTCAGCCCTCCCGTGGAAACATATTAT
GTGGTCAATAGTGATGGCAAACCTCTGTGGGTTTCTAGGTTTGAATCTG
TGCCAGAAGTTCCAAGTTCTCTGCTTCTTTGACetctctctctctctctct
tctctctctctctctctctctcCCTTCATTGCTTTTTGTTGATTTAATTC
CTTCTCACTTAACTATCTAGCCATATGCTTCAATCTTCTTCATATAAA
TAAGAAAAGGGAAGAGGTGATGGATAGGATATGTGAGTTCCCGCTTCTA
TCTCTGTTGACAGCTCATGTGCCAAACAGGATGTATACAGGCCCAATG
AGGCACAGCCAAGAATAAGTGACTAGAACTCACTGTGTGCCACAGTCT
AAAGATGCCAGGGTACTGTAGGTGAATAAGAAACTCCTCAAAGATGCTG
TGAGACAGTGGCCAGTAGGACAGCACAAACACAGACCCAGTAGGACCC
TGAGCATGGAGAGGGGTCTAGGATCTGGAAAGCTGGAGAGAATGCTTGG
ACAGTTGAGAAACCTA
```

B2-R1 in Human (*GRCh37/hg19*) compared to *Mouse (NCBI37/mm9)*

Conservation: 98.3% of bases, 100.0% of span

Position: chr20:6711276-6712353

Band: p12.3 Strand: +

```
>hg19_dna range=chr20:6711276-6712353
GTGAAATTAAGGGCTTTTCATAGGCCACAGTGATCAGTCAAGATGCCCGTA
GACCCATGTTGACTCCACCAAGAATCCTATCTTCTAGAAGGAAAGGCC
GAGTTGCCAACACCCGTGAAATAACTGTTTTATTGAAGACATCACAAA
AGGCTGGTTCTGGCTACCTTGCCACCTCATACCCCAAAATGGTTTTGT
TTCGGCTCACTTACGGCTGCCTGCCAGTACCCAGTAAGCAAGCCAGCAC
ACTTAAACAAGCTGGCCATCACCACATTTAAAATATACAACGCAACGC
GGCATTTCCAAACCCTGTGCTGGGGAAGAAACCTCCCAAGTACTGAGTTT
CCAACATTTTACCTTTTAGAAGCCAACCTGCAGTCATTTTCCCTTTGAC
TCTCAAGGGAATCTGCAGGGACCGTTTTCAGAAAATTTGTCCTCCAT
AGAGCACCAGAGCTGCGGTATTTAATAGCTCTCTCAGCCCTCCCTCTG
GGAACATATATTATGTGATCATTAGTAGTGATGGCAAACCTCACTGGGTTT
CCAGTGTGGAGTCTGTCGCAAGTTCAGAGTTCTTTCTTTCTTGACAAC
TCAAAATCTCCCTATTTTCCCTTTTATTTATCATTTGTTGTTTATG
TGTGCTTTGCTTTGTTTTCTTCTTATCTTACCACACTCCAGCCCTTTCT
CCACTTTACACACAGAAAGGAAGGAGTGGGCGAAGAGCATGAGTT
TCTTCTGTTTCTCTCCATTGAGGTGCCTGGATGAAACAGAATTGTAA
TCAGGCCCAATTAAGTGGCACACAGAAAGAGTGACTAGACACTGCT
ATACGCCAGGCACAATTCGGGGTGGCCAGTGTGATTTGTAGGTGAG
TAAAGGATAAGGGCTTTCTTGAAGGGTTCCTTCCACTTCCAACTGGGATG
GGGACAAACAGGCCAATAGATGTGTTGACGAAGGCATGCAGACATTGCTC
CACCATAATACTTAAGGACTAAGCAGTCAAGTTTACAGGAAGACTGAAT
CGGTGCAATAAGAAAGTTGTAAAACAA
```

Element B2-R2 (3.5 kb downstream of the 3'UTR of Bmp2)

Score: 1 Position: chr2:133392125-133392140

Band: 2qF2 Strand: -

```
>mm9_dna range=chr2:133406066-133407181
cagcagtagtgaagtgtaagccgaataaacctttctccccaaactgtct
tcttggtcataatggtttgtgaggaatagaacccctgactaagacaGAGG
CTGACCTTGGTTTCCCACAATGTGAGTTCAGGAATAACATACTGAGGC
CCCGTTTTGCATTTAGAGGTGGGGATGTTGCTTCCAGGAAGCAAAGC
TGGCTGCACAGCTGTCTACAGGACTGTGTCAAGCCGAGTTCTCTGGGA
CATGCATGGACAAAAGACTATGAGAGCCTTGCTTGGCTGTATCTCTCTG
TCTCTGGCATCTTATAAGTAAGAAGGAAAGCTTTGTTTTCAGTTTCTT
TTCCTTTTTTCCCAACTAATCTTCTGCCATGAAAAGACAGTTATACAT
AAACTACCTGGCCGAAAGGAATCTTCAGCCCTAGGAGCTTGGCCAGGGAG
GCATTAGAAAGCACTTGAATCTACAATCTAGTCTTGTGGCCCTGCCA
GGGAACAAATAACCACTCTCCAAGAAATAGGTAGAAATATGAATTCATTT
TCTCTGGTGGAGAGAGTGTGAGGAAAGTAAAGGACCGAAGTATCCTTT
CTCTCGGGGACTGAAGGTCTCTTACCAGCAGAAGGTTCTGTGCTCCAG
CATGCAAGACGAAGGAAAAGGGTGCAGTAAACACTTATCTTATCAAACG
TGCTAATGGGTAAACCACTATTTCTCACAACTCCAAGAGAGTCTTCACT
GGGGTTTTAGGGTGGCCAAATGCCAGGATTTCAAGTTTctctctctctc
ctctctctctctctctctctctctctctctctctctctctctctctctc
tctctctctctctctctctctctctctctctctctctctctctctctctc
tctctctctctctctctctctctctctctctctctctctctctctctctc
tctctctctctctctctctctctctctctctctctctctctctctctctc
tctctctctctctctctctctctctctctctctctctctctctctctctc
tctctctctctctctctctctctctctctctctctctctctctctctctc
tctctctctctctctctctctctctctctctctctctctctctctctctc
GCTTCTTTCTAGATGACTAGATGGGCTTACGAAAGAAGTCTATCCAAAT
TCTTCCCTTTCTCTGT
```

B2-R2 in Human (*GRCh37/hg19*) compared to *Mouse (NCBI37/mm9)*

Conservation: 91.7% of bases, 97.4% of span

Position: chr20:6764356-67165307

Band: p12.3 Strand: +

```
>hg19_dna range=chr20:6764356-6765307
tgtgtctgtggaatgtaatagtacataatgattttggtttctctctctct
GTCCAAATGCCAAGCATAGGGCACCCTTCTTCTGTTTTACTGAGTTTCTCA
TTTTGCGTAGGTCTCTGAATTCGCATGAGTCCCTCTGAGGTGCTTAAAG
CAGTACTAAGCAAGACTGACTTTAACACCCTTAAAGCTTGCCTTTG
CCCATGTCTGGGCCCACTCCAAGGCAATGCCAGAAATGATATTTGT
TGCAGTCCATTCGATGAGGAGGCTCTAAGCAAACCACCGATCTGCTTA
AAGCCTCCCTCATAAAGGAGCAGGATCTCATCTGGACTGCATTACTGTTG
AACCGCTTGGCCCAACACTATGAGAGAAATATTTAAGCACTTTTACT
GTACAACCTATTTCCAAATGTGTGATTTTTATTGATTTTCAAGAGGCAAGC
TAATTGGCCCATGGCAACTTGTGTTAACATTTAATGAGATCAGGAAC
ACAGTTTTATGAAAGCTTTTGTATAGTAACTGCAAAGTTCAGAACTGT
TTTTACTTCTGACAGTGTGGCCCTAGCTTAAATGGTTGTTTATTG
CTTAAAGATGTAACCTTGTCTTAGCCCGGTGTGTGAAACTATACCCCTC
ATCCTGCATACACATTTCTCATTGCTTTTACTCACTCTGACTTCTCT
TTCTGATATCTACAATGAGACTTTTTCTGTTTTAATTGTCTCAAAATG
AGTTGCTACTTTTGGATGTGAGAAATCAacacacacacacacacacacaca
cacacgtgcacgataacatacATCATGAAGTAAAGTGTCTGTATTGTTCA
CTTTGTTTTGGGTTGAGTCTCTTTTGGCACTTGGTGTCTAGACGACCA
GCAGACAAAAGTTAAAGATTGAAAAGGCATTTTAAAGATGCCAAATCTT
```

Element B3-R2 (18 kb downstream of the 3'UTR of Bmp2)

Score: 1 Position: chr2:133406566-133406581

Band: 2qF2 Strand: -

```
>mm9_dna range=chr2:133391625-133392640
cacacgtacatGTAACAAGCACACATGTTACATGCAGCATGCACACA
CATGCATGCACATCTCTGAAGGAATTTTCGTTTGTCTATGCTAGAGTCT
GAATGCTGAGGCAAGAGCATCAACCGTCCCCCACCCTGGGCCA
ATCCCTATGGATTATCATTGTTGTTAGGTCTCTAACTCTGAATGGAGA
CCCTCTGAGGTGTACACCATACGCTGACTTTAACAGCACTTAAAGCTT
GTGTTTGCTGTGTGCTGGGCCCTCGCCAAAGGCAATGCTGGGATCCAT
TACTGTTGCACTCCATCTGATGAGGAGGCTCTCAGCAAAGCCCGATC
TGCTCACAGCTCTCTCATAAGGAGCAAGGACTCTGTCGACCGAATTTA
CCCTAGAACCCTGGCCACAACACTATGAGAGAATAATTATTGAACTAT
TTTACTGTACAACATTTCCAAATTTGTTATTTTTATTGATTTCAAGGAG
GCAAGCTAATTGCCCCATGGCAACTTGATTTAACATTTAATGAAGTCA
GGAAGCAGAGTTTATGAAAAGCGTTTTGATAGCGACTGCAAAGCTTCAAG
AATGTTTTACACTTCTGACGGGGCTGGGCCTCGCTTAAATGGTTGTTTT
TTATTGCTTAAAGAGTAAACCGTGCCTTAGCCAGTGTGTGGAAACTAT
ACCCTCACTCCCGATTCACATTTTCTGTTGCTTTTCTCTCGTCTCCCA
TGTCTATTGTACCATCTACAATCAAGACTTTTCTCTCTTTGTATGCAAGCA
AGTTTCTATCTTACAGCTGATGACACTAcacacacacacacacacacacac
acacacacacacacacacacacacacacacacacacacacacacacacacacac
AATGTGCTGCTTCACTGTGTTGGGTTGAGTTTCTGTTCAGCACTTGGTT
GCTAGACAAACCAAGCAGACAAAATTTAGCGATTTCAAAGGCATTTTAAAG
GACGACAAAATTTTGA
```

B2-R3 in Human (*GRCh37/hg19*) compared to *Mouse (NCBI37/mm9)*

Conservation: 68.1% of bases, 90.7% of span

Position: chr20:6780656-6781511

Band: p12.3 Strand: +

```
>hg19_dna range=chr20:6780656-6781511
CCCTGGTCTTCCACACAGCTCAGCACAAGAAAATGTTTCTTTGAAGGA
AGCAGCCTCTAGGACCTATGACAATTTTCAAGATTTTTTTTTTCTAAG
TGCATTTCTCCGCTACAGAAGTGGCTCAGTTGATGCTTTGGAAGTTGT
CTCAGCTGTTTCAAAAAGTCCATGATGTTAACCCTCATTTTCAGGGACGCA
ATGAGCCTGACTCTCCTGCATCTCCTTTGCTGAGGCATAGACCCTGAC
TGCTTATGAAAAGAAGCAAGATAATGATATCCCTCTCTGCTTCCACCAC
CACTCAATGTAACCTTCTGCCATGAACATAACCAGCCACACATAAACTGT
CTGCAGAAAAGGAAGTCCATCTCATATAAGCTTTGGCAGGAGGTATGTAG
GTCAACAAAGAAATCTCTGCTACTCGTTTGCAGTCAATTCATGAGGCTA
ATTGTCACCTCCAGAAATCAGCCAGGAAGAAATAAAATGCAATTTCCCTG
ATAAAGAAGAAGCACTAAGAAATGGGATGTGAGATGACCCCTTCCAA
GGAAGCTGTTGGGCTTGAACAGCCATCCGAGTCCCTGCTAAGAGCAGAT
AACTAGATAAGAGTTTACATGACTTTGGCTGTGTGAGGATGCTCTGTG
CTCTCTTGAGCTCCAGACAGTTGGTTTCAAAAAGTACCAGGGTGCCGAA
GTGCCAGGTCATAAGTCTGAGTATTATGTTTTATAATCTCCATTCGA
GTGTCTTTTTGATGTTGTCTAGAGATAACGGTTTCTCTCTAGATCCTC
CTCTAGGTAACTGTATGGCATTGAGGACATCTGTACAATTTCTCTCT
```
